# Supplementary material
Source: PubMed Central journal article supplement (PMC5444116)
Supplement: AAC.00226-17_zac006176238s1.pdf [file AAC.00226-17_zac006176238s1.pdf]

1 **Supplementary Table 1.** Chest computed tomography (CT) scan characteristics of the resected lesion

2 (n=7)\*

| ID | Dominant Lesion | Maximum Wall Thickness (mm) | Maximum Transverse Diameter (mm) | Maximum Sagittal Diameter (mm) | Connection to Bronchus | Calcification |
|----|-----------------|-----------------------------|----------------------------------|--------------------------------|------------------------|---------------|
| 1  | NA              | -                           | -                                | -                              | -                      | -             |
| 2  | Cavity          | 8                           | 14                               | 36                             | Yes                    | No            |
| 3  | Mass            | -                           | 34                               | 37                             | Yes                    | Yes           |
| 4  | NA              | -                           | -                                | -                              | -                      | -             |
| 5  | Mass            | -                           | 58                               | 54                             | No                     | Yes           |
| 6  | Mass            | -                           | 77                               | 60                             | No                     | Yes           |
| 7  | NA              | -                           | -                                | -                              | -                      | -             |
| 8  | Cavity          | -                           | 54                               | 70                             | Yes                    | No            |
| 9  | Consolidation   | -                           | 62                               | 31                             | Yes                    | No            |
| 10 | Cavity          | 8                           | 49                               | 34                             | Yes                    | No            |

3 \* 7 patients had chest CT scans available for review by study radiologists

4 NA, not available; For the three patients without a preoperative CT scan for review, obtained radiological

5 reports indicated all patients had cavitory lesions with a maximum diameter between 2.1 and 3.5

6 centimeters

7

8

9

10

11

12

13

14

15

16

17

18

19 **Supplementary Table 2.** Pathology Characteristics of Resected Pulmonary Tissue<sup>^</sup>

| ID | Necrosis | PMNs | Mononuclear Cells | Fibrosis | Vascularization | AFB Staining | Tissue pH |
|----|----------|------|-------------------|----------|-----------------|--------------|-----------|
| 1  | 3        | 1*   | 2                 | 2        | 0               | 3            | 7.2       |
| 2  | 2        | 2*   | 3                 | 1&2      | 1               | 2            | 5.5       |
| 3  | 3        | 0    | 3                 | 1&2      | 1               | 3            | 7.2       |
| 4  | 2        | 2    | 3                 | 2        | 1               | 1            | 5.5       |
| 5  | 3        | 0    | 3                 | 2        | 1               | 2            | 5.5       |
| 6  | 1        | 1    | 3                 | 2        | 1               | 0            | 5.5       |
| 7  | 3        | 1*   | 3                 | 2        | 1               | 1            | 5.5       |
| 8  | 1        | 1    | 3                 | 2        | 1               | 1            | 5.5       |
| 9  | 1        | 0    | 3                 | 1        | 1               | 0            | 5.5       |
| 10 | 3        | 1    | 3                 | 2        | 1               | 2            | 5.5       |

20 PMNs, polymorphonuclear cells; AFB, acid fast bacillus

21 \*Eosinophils present

22 <sup>^</sup>Grading system using 4x magnification is as follows for each variable:

23 Necrosis: 0, not present; 1 (rare), scattered within a field; 2 (moderate), confluent within a field; 3  
 24 (severe), present in multiple confluent fields.

25 PMNs: 0, not present; 1, scattered within a field; 2, present within fields

26 Mononuclear: 1, small granuloma that fits in a field; 2, separate fields with granulomas; 3, mostly  
 27 granulomatous inflammation

28 Fibrosis: 1, interspersed with granuloma; 2, surrounding granuloma

29 Vascularization: 0, not present; 1, present

30 AFB staining: 0, not present; 1, rare; 2, scattered in a field; 3, many in a field

31

32

33

34

35

36

37

38  
39  
40  
41  
42  
43  
44  
45  
46  
47  
48  
49  
50  
51  
52  
53  
54  
55  
56  
57  
58  
59  
60  
61

**Supplementary Table 3.** Genetic mutations associated with resistance among two patients with tissue cultures positive for *M. tuberculosis*

| Subject                         | 1*      | 2*      |
|---------------------------------|---------|---------|
| Number of <i>M. tb</i> isolates | 7       | 4       |
| Sputum                          | 2       | 1       |
| Tissue                          | 5       | 3       |
| <i>M. tb</i> strain phylotype   | Beijing | Beijing |
| Gene Regions                    |         |         |
| <i>katG</i>                     | S315T   | S315T   |
| <i>rpoB</i>                     | S450L   | S450L   |
| <i>pncA</i>                     | -       | -       |
| <i>rpsA</i>                     | -       | -       |
| <i>embA,B,C</i>                 | M306V   | M306V   |
| <i>rpsL</i>                     | -       | L88A    |
| <i>eis</i>                      | -       | -       |
| <i>gyrA</i>                     | A94T    | A94T    |
| <i>gyrB</i>                     | A504B   | -       |

Sequence data for all *M. tuberculosis* isolates has been deposited in the NCBI Sequence Read Archive (SRA) and is available using the accession number SRP102071.

\* All *M. tuberculosis* isolates for each patient were of the same strain and all had the same genetic mutations associated with resistance identified
